# Supplementary material for: Medium-Term Effects of a Tailored Web-Based Parenting Intervention to Reduce Adolescent Risk of Depression and Anxiety: 12-Month Findings From a Randomized Controlled Trial
Source: PubMed Central journal article supplement (PMC6830751; doi:10.2196/13628), 2019-08-15
Supplement: jmir_v21i8e13628_app3.pdf [file jmir_v21i8e13628_app3.pdf]

### Multimedia Appendix 3: Sample characteristics at baseline

Table 1

*Characteristics of the parent participant sample at baseline by intervention arm*

|                                                                                                   | Intervention<br>( <i>n</i> = 179) | Control<br>( <i>n</i> = 180) | <i>t</i> or $\chi^2$ | <i>p</i>         |
|---------------------------------------------------------------------------------------------------|-----------------------------------|------------------------------|----------------------|------------------|
| Parent gender                                                                                     |                                   |                              | 0.94 <sup>a</sup>    | .33 <sup>a</sup> |
| Male, <i>n</i> (%)                                                                                | 26 (14.5)                         | 20 (11.1)                    |                      |                  |
| Female, <i>n</i> (%)                                                                              | 153 (85.5)                        | 160 (88.9)                   |                      |                  |
| Parent age, <i>M</i> ( <i>SD</i> )                                                                | 45.2 (5.26)                       | 45.1 (5.14)                  | 0.14                 | .89              |
| Parent marital status                                                                             |                                   |                              | 3.23                 | .36              |
| Single, <i>n</i> (%)                                                                              | 12 (6.7)                          | 9 (5.0)                      |                      |                  |
| Married/de facto, <i>n</i> (%)                                                                    | 138 (77.1)                        | 137 (76.1)                   |                      |                  |
| Separated/divorced, <i>n</i> (%)                                                                  | 27 (15.1)                         | 34 (18.9)                    |                      |                  |
| Widowed, <i>n</i> (%)                                                                             | 2 (1.1)                           | 0 (0)                        |                      |                  |
| Child gender                                                                                      |                                   |                              | 0.35 <sup>a</sup>    | .56 <sup>a</sup> |
| Male, <i>n</i> (%)                                                                                | 102 (57.0)                        | 97 (53.9)                    |                      |                  |
| Female, <i>n</i> (%)                                                                              | 77 (43.0)                         | 83 (46.1)                    |                      |                  |
| Child age, <i>M</i> ( <i>SD</i> )                                                                 | 13.7 (1.05)                       | 13.7 (1.08)                  | -0.43                | .67              |
| Family situation                                                                                  |                                   |                              | 8.77                 | .07              |
| Child participant lives with both parents, <i>n</i> (%)                                           | 131 (73.2)                        | 122 (67.8)                   |                      |                  |
| Parents separated but both involved in care of child participant, <i>n</i> (%)                    | 21 (11.7)                         | 36 (20.0)                    |                      |                  |
| Parents separated with only registered parent involved in care of child participant, <i>n</i> (%) | 16 (8.9)                          | 14 (7.8)                     |                      |                  |
| Sole parent of child participant, <i>n</i> (%)                                                    | 10 (5.6)                          | 4 (2.2)                      |                      |                  |
| Other, <i>n</i> (%)                                                                               | 1 (0.6)                           | 4 (2.2)                      |                      |                  |
| Number of children, <i>M</i> ( <i>SD</i> )                                                        | 2.37 (0.94)                       | 2.32 (1.00)                  | 0.45                 | .65              |
| Language                                                                                          |                                   |                              | 0.03 <sup>a</sup>    | .87 <sup>a</sup> |
| English, <i>n</i> (%)                                                                             | 150 (83.8)                        | 152 (84.4)                   |                      |                  |
| Other, <i>n</i> (%)                                                                               | 29 (16.2)                         | 28 (15.6)                    |                      |                  |
| Parent employment                                                                                 |                                   |                              | 1.56 <sup>a</sup>    | .46              |
| Unemployed, <i>n</i> (%)                                                                          | 21 (11.7)                         | 27 (15.0)                    |                      |                  |
| Part-time, <i>n</i> (%)                                                                           | 81 (45.3)                         | 71 (39.4)                    |                      |                  |
| Full-time, <i>n</i> (%)                                                                           | 77 (43.0)                         | 82 (45.6)                    |                      |                  |
| Parent studying status                                                                            |                                   |                              | 1.55                 | .46              |
| Not studying, <i>n</i> (%)                                                                        | 149 (83.2)                        | 145 (80.6)                   |                      |                  |
| Studying part-time, <i>n</i> (%)                                                                  | 4 (2.2)                           | 2 (1.1)                      |                      |                  |

|                                                           |            |                        |                   |                  |
|-----------------------------------------------------------|------------|------------------------|-------------------|------------------|
| Studying full-time, <i>n</i> (%)                          | 26 (14.5)  | 33 (18.3)              |                   |                  |
| Parent's highest education level                          |            |                        | 3.93 <sup>a</sup> | .56 <sup>a</sup> |
| Year 7-12, <i>n</i> (%)                                   | 26 (14.5)  | 24 (13.3)              |                   |                  |
| Trade/apprenticeship, <i>n</i> (%)                        | 2 (1.1)    | 4 (2.2)                |                   |                  |
| Other TAFE/Technical, <i>n</i> (%)                        | 18 (10.1)  | 13 (6.7)               |                   |                  |
| Diploma, <i>n</i> (%)                                     | 26 (14.5)  | 37 (21.1)              |                   |                  |
| Bachelor degree, <i>n</i> (%)                             | 63 (35.2)  | 56 (31.1)              |                   |                  |
| Postgraduate degree, <i>n</i> (%)                         | 44 (24.6)  | 46 (25.6)              |                   |                  |
| Parent's mental health diagnosis                          |            |                        | 5.11 <sup>a</sup> | .16 <sup>a</sup> |
| None, <i>n</i> (%)                                        | 72 (40.2)  | 72 (40.0)              |                   |                  |
| Past history, <i>n</i> (%)                                | 60 (33.5)  | 77 (42.8) <sup>p</sup> |                   |                  |
| Current diagnosis, <i>n</i> (%)                           | 25 (14.0)  | 17 (9.4)               |                   |                  |
| Past and current diagnosis, <i>n</i> (%)                  | 20 (11.2)  | 13 (7.2)               |                   |                  |
| Unanswered, <i>n</i> (%)                                  | 2 (1.1)    | 1 (0.6)                |                   |                  |
| Child's past mental health diagnosis                      |            |                        | 9.26 <sup>a</sup> | .24 <sup>a</sup> |
| Depression, <i>n</i> (%)                                  | 3 (1.7)    | 0 (0)                  |                   |                  |
| Any anxiety disorder, <i>n</i> (%)                        | 12 (6.7)   | 13 (7.2)               |                   |                  |
| Depression and anxiety                                    | 1 (0.6)    | 1 (1.0)                |                   |                  |
| Autism or Asperger's syndrome, <i>n</i> (%)               | 4 (2.2)    | 5 (2.8)                |                   |                  |
| Other, <i>n</i> (%)                                       | 11 (6.1)   | 20 (11.1)              |                   |                  |
| Multiple diagnoses, <i>n</i> (%)                          | 5 (2.8)    | 8 (4.4)                |                   |                  |
| No formal diagnosis, but parent concerned, <i>n</i> (%)   | 26 (14.5)  | 43 (23.9)              |                   |                  |
| No diagnosis, <i>n</i> (%)                                | 105 (58.7) | 87 (48.3)              |                   |                  |
| Unanswered, <i>n</i> (%)                                  | 16 (8.9)   | 14 (7.8)               |                   |                  |
| Child's current mental health diagnosis                   |            |                        | 5.51 <sup>a</sup> | .60 <sup>a</sup> |
| Depression, <i>n</i> (%)                                  | 0 (0)      | 1 (0.5)                |                   |                  |
| Any anxiety disorder, <i>n</i> (%)                        | 14 (15.5)  | 17 (15.5)              |                   |                  |
| Depression and anxiety                                    | 3 (2.5)    | 2 (1.1)                |                   |                  |
| Autism or Asperger's syndrome <sup>b</sup> , <i>n</i> (%) | 3 (1.7)    | 4 (2.2)                |                   |                  |
| Other, <i>n</i> (%)                                       | 11 (9.5)   | 8 (9.5)                |                   |                  |
| Multiple diagnoses, <i>n</i> (%)                          | 8 (9.0)    | 10 (5.6)               |                   |                  |
| No formal diagnosis, but parent concerned, <i>n</i> (%)   | 36 (20.1)  | 50 (27.8)              |                   |                  |
| No diagnosis, <i>n</i> (%)                                | 104 (58.1) | 88 (48.9)              |                   |                  |
| Unanswered, <i>n</i> (%)                                  | 3 (1.7)    | 4 (2.2)                |                   |                  |

<sup>a</sup> Values differ to original publication (Yap et al., 2018) due to errors detected when preparing the current paper.

<sup>b</sup> Two children who were reported by their parents to have a past diagnosis of autism or Asperger's syndrome were categorized under "Multiple diagnosis" as they also had another current mental health diagnosis.

Adapted from: Yap, M. B. H., Mahtani, S., Rapee, R. M., Nicolas, C., Lawrence, K. A., Mackinnon, A. & Jorm, A. F. (2018). A tailored web-based intervention to improve parenting risk and protective factors for adolescent

depression and anxiety problems: Postintervention findings from a randomized controlled trial. *Journal of Medical Internet Research*, 20(1), e17. doi:10.2196/jmir.9139
