# Supplementary material for: Medium-Term Effects of a Tailored Web-Based Parenting Intervention to Reduce Adolescent Risk of Depression and Anxiety: 12-Month Findings From a Randomized Controlled Trial
Source: PubMed Central journal article supplement (PMC6830751; doi:10.2196/13628), 2019-08-15
Supplement: jmir_v21i8e13628_app4.pdf [file jmir_v21i8e13628_app4.pdf]

**Multimedia Appendix 4: Observed scores for all outcome measures at each measurement occasion**

Table 1

*Means, standard deviations and sample size for all outcome measures at each measurement occasion, by intervention arm*

| Outcome                                    | Group                            |                                 |
|--------------------------------------------|----------------------------------|---------------------------------|
|                                            | Intervention<br><i>M (SD), n</i> | Control<br><i>M (SD), n</i>     |
| <b>PRADAS</b>                              |                                  |                                 |
| Baseline                                   | 46.58 (7.53)<br><i>n = 179</i>   | 47.88 (7.60)<br><i>n = 180</i>  |
| Post-intervention (3 months post baseline) | 52.06 (8.42)<br><i>n = 155</i>   | 49.96 (7.55)<br><i>n = 164</i>  |
| 12-month follow-up                         | 51.81 (7.92)<br><i>n = 158</i>   | 50.21 (7.52)<br><i>n = 159</i>  |
| <b>PRADAS-A</b>                            |                                  |                                 |
| Baseline                                   | 24.44 (5.62)<br><i>n = 163</i>   | 24.91 (5.68)<br><i>n = 169</i>  |
| Post-intervention                          | 23.38 (6.35)<br><i>n = 150</i>   | 24.09(6.20)<br><i>n = 158</i>   |
| 12-month follow-up                         | 23.53 (6.26)<br><i>n = 141</i>   | 24.32 (6.28)<br><i>n = 146</i>  |
| <b>SCAS-P</b>                              |                                  |                                 |
| Baseline                                   | 17.99 (11.60)<br><i>n = 179</i>  | 18.51 (12.36)<br><i>n = 180</i> |
| Post-intervention                          | 15.19 (12.10)<br><i>n = 154</i>  | 14.78 (11.07)<br><i>n = 164</i> |
| 12-month follow-up                         | 13.95 (11.74)<br><i>n = 155</i>  | 15.42 (12.79)<br><i>n = 159</i> |
| <b>SCAS-C</b>                              |                                  |                                 |
| Baseline                                   | 28.73 (17.34)<br><i>n = 163</i>  | 30.14 (17.40)<br><i>n = 169</i> |
| Post-intervention                          | 28.31 (20.22)<br><i>n = 150</i>  | 26.70 (17.11)<br><i>n = 158</i> |
| 12-month follow-up                         | 26.36 (18.97)<br><i>n = 141</i>  | 25.64 (16.93)<br><i>n = 145</i> |
| <b>SMFQ-P</b>                              |                                  |                                 |
| Baseline                                   | 5.07 (5.62)<br><i>n = 179</i>    | 4.75 (4.98)<br><i>n = 180</i>   |
| Post-intervention                          | 3.60 (4.32)<br><i>n = 154</i>    | 3.38 (4.38)<br><i>n = 164</i>   |
| 12-month follow-up                         | 3.46 (5.15)<br><i>n = 155</i>    | 4.16 (5.09)<br><i>n = 159</i>   |
| <b>SMFQ-C</b>                              |                                  |                                 |
| Baseline                                   | 6.16 (6.12)<br><i>n = 163</i>    | 6.42 (5.79)<br><i>n = 169</i>   |
| Post-intervention                          | 6.25 (6.60)<br><i>n = 150</i>    | 6.03 (5.49)<br><i>n = 158</i>   |
| 12-month follow-up                         | 6.70 (6.64)<br><i>n = 141</i>    | 6.75 (6.91)<br><i>n = 145</i>   |
