# Supplementary material for: Medium-Term Effects of a Tailored Web-Based Parenting Intervention to Reduce Adolescent Risk of Depression and Anxiety: 12-Month Findings From a Randomized Controlled Trial
Source: PubMed Central journal article supplement (PMC6830751; doi:10.2196/13628), 2019-08-15
Supplement: jmir_v21i8e13628_app5.pdf [file jmir_v21i8e13628_app5.pdf]

**Multimedia Appendix 5: Results of primary and secondary outcome MRRMs, run on square root transformed data**

Table 1

*MMRM planned contrast test of baseline to 12-month interaction, for square root transformed symptom measures*

| Outcome measure    | Estimated Marginal Means (SE) |             | $t^a$ | df     | $p$  | $d_{\text{interaction}}$ (95% CI) <sup>b</sup> | $d_{12\text{-month}}$ (95% CI) <sup>c</sup> |
|--------------------|-------------------------------|-------------|-------|--------|------|------------------------------------------------|---------------------------------------------|
|                    | Intervention                  | Control     |       |        |      |                                                |                                             |
| <b>SCAS-P</b>      |                               |             | -1.18 | 319.21 | .237 | -0.13<br>(-0.33, 0.08)                         | -0.11<br>(-0.33, 0.11)                      |
| Baseline           | 4.00 (0.10)                   | 4.08 (0.10) |       |        |      |                                                |                                             |
| 12-month follow-up | 3.42 (0.12)                   | 3.65 (0.11) |       |        |      |                                                |                                             |
| <b>SCAS-C</b>      |                               |             | 1.17  | 296.14 | .245 | 0.13<br>(-0.09, 0.34)                          | 0.00<br>(-0.23, 0.24)                       |
| Baseline           | 5.13 (0.12)                   | 5.29 (0.12) |       |        |      |                                                |                                             |
| 12-month follow-up | 4.88 (0.14)                   | 4.87 (0.14) |       |        |      |                                                |                                             |
| <b>SMFQ-P</b>      |                               |             | -2.04 | 324.98 | .043 | -0.21<br>(-0.42, -0.01)                        | -0.17<br>(-0.39, 0.05)                      |
| Baseline           | 1.85 (0.09)                   | 1.81 (0.09) |       |        |      |                                                |                                             |
| 12-month follow-up | 1.34 (0.10)                   | 1.58 (0.10) |       |        |      |                                                |                                             |
| <b>SMFQ-C</b>      |                               |             | 0.75  | 300.80 | .454 | 0.08<br>(-0.13, 0.30)                          | 0.03<br>(-0.20, 0.26)                       |
| Baseline           | 2.16 (0.10)                   | 2.21 (0.09) |       |        |      |                                                |                                             |
| 12-month follow-up | 2.25 (0.12)                   | 2.19 (0.12) |       |        |      |                                                |                                             |

<sup>a</sup> $t$  statistic of the planned contrast test of baseline to 12-month interaction, estimated under the group  $\times$  measurement occasion mixed model.

<sup>b</sup>Cohen's  $d$  effect size of the baseline to 12-month interaction effect, calculated based on the  $t$  statistic of the planned contrast.

<sup>c</sup>Cohen's  $d$  effect size of the difference between groups at 12-month follow-up.
