# Supplementary material for: Medium-Term Effects of a Tailored Web-Based Parenting Intervention to Reduce Adolescent Risk of Depression and Anxiety: 12-Month Findings From a Randomized Controlled Trial
Source: PubMed Central journal article supplement (PMC6830751; doi:10.2196/13628), 2019-08-15
Supplement: jmir_v21i8e13628_app6.pdf [file jmir_v21i8e13628_app6.pdf]

## Multimedia Appendix 6: Results of mediation analyses

Table 1

*Indirect effects of group on 12-month symptom measures scores, mediated by post-intervention PRADAS score.*

| Outcome measure <sup>a</sup> | <i>b</i> | Boot SE | 95% CI <sup>b</sup> |
|------------------------------|----------|---------|---------------------|
| SCAS-P                       | 0.24     | 0.35    | -0.42, 0.95         |
| SCAS-C                       | 0.19     | 0.45    | -0.62, 1.17         |
| SMFQ-P                       | -0.26    | 0.15    | -0.57, 0.03         |
| SMFQ-C                       | -0.12    | 0.20    | -0.53, 0.27         |

<sup>a</sup>All models include post-intervention PRADAS score as the mediator variable and baseline PRADAS and baseline symptom measure (corresponding to the outcome measure) as covariates.

<sup>b</sup>Confidence intervals are bias-corrected bootstrapped 95% confidence intervals based on 5000 bootstrapped samples.

Table 2

*Indirect effects of group on 12-month symptom measures scores, mediated by post-intervention PRADAS score, using square root transformed data for symptom measures.*

| Outcome measure <sup>a, b</sup> | <i>b</i> | Boot SE | 95% CI <sup>c</sup> |
|---------------------------------|----------|---------|---------------------|
| SCAS-P                          | 0.02     | 0.04    | -0.06, 0.10         |
| SCAS-C                          | 0.03     | 0.04    | -0.05, 0.12         |
| SMFQ-P                          | -0.08    | 0.04    | -0.16, -0.01        |
| SMFQ-C                          | -0.01    | 0.04    | -0.09, 0.07         |

<sup>a</sup>All models include post-intervention PRADAS score as the mediator variable and baseline PRADAS and baseline symptom measure (corresponding to the outcome measure) as covariates.

<sup>b</sup>All symptom measure variables were square root transformed.

<sup>c</sup>Confidence intervals are bias-corrected bootstrapped 95% confidence intervals based on 5000 bootstrapped samples.
