# Supplementary material for: Medium-Term Effects of a Tailored Web-Based Parenting Intervention to Reduce Adolescent Risk of Depression and Anxiety: 12-Month Findings From a Randomized Controlled Trial
Source: PubMed Central journal article supplement (PMC6830751; doi:10.2196/13628), 2019-08-15
Supplement: jmir_v21i8e13628_app7.pdf [file jmir_v21i8e13628_app7.pdf]

## Multimedia Appendix 7: Results of *post-hoc* moderation analyses

Table 1

*MMRM three-way interaction results of primary and secondary outcomes moderated by baseline symptom measures*

| Outcome measure and moderator variable | $F^a$ | df        | $p$    | $d_{\text{interaction}}$<br>(95% CI) <sup>b</sup> |
|----------------------------------------|-------|-----------|--------|---------------------------------------------------|
| <b>PRADAS</b>                          |       |           |        |                                                   |
| Moderated by SCAS-C                    | 1.79  | 2, 296.73 | .168   | 0.15<br>(-0.07, 0.36)                             |
| Moderated by SMFQ-C                    | 0.04  | 2, 295.71 | .964   | 0.02<br>(-0.19, 0.24)                             |
| <b>PRADAS-A</b>                        |       |           |        |                                                   |
| Moderated by SCAS-P                    | 10.23 | 2, 296.81 | < .001 | 0.35<br>(0.13, 0.57)                              |
| Moderated by SMFQ-P                    | 2.02  | 2, 297.56 | .13    | 0.16<br>(-0.06, 0.37)                             |
| <b>SCAS-P</b>                          |       |           |        |                                                   |
| Moderated by SCAS-C                    | 0.13  | 2, 287.16 | .878   | 0.04<br>(-0.18, 0.26)                             |
| <b>SCAS-C</b>                          |       |           |        |                                                   |
| Moderated by SCAS-P                    | 2.19  | 2, 296.68 | .113   | 0.16<br>(-0.05, 0.38)                             |
| <b>SMFQ-P</b>                          |       |           |        |                                                   |
| Moderated by SMFQ-C                    | 4.40  | 2, 295.27 | .013   | 0.23<br>(0.01, 0.45)                              |
| <b>SMFQ-C</b>                          |       |           |        |                                                   |
| Moderated by SMFQ-P                    | 0.33  | 2, 295.88 | .718   | 0.06<br>(-0.15, 0.28)                             |

<sup>a</sup>F test of the three-way group × measurement occasion × moderator interaction, estimated under group × measurement occasion mixed model.

<sup>b</sup>Cohen's  $d$  effect size of the group × measurement occasion × moderator interaction effect.

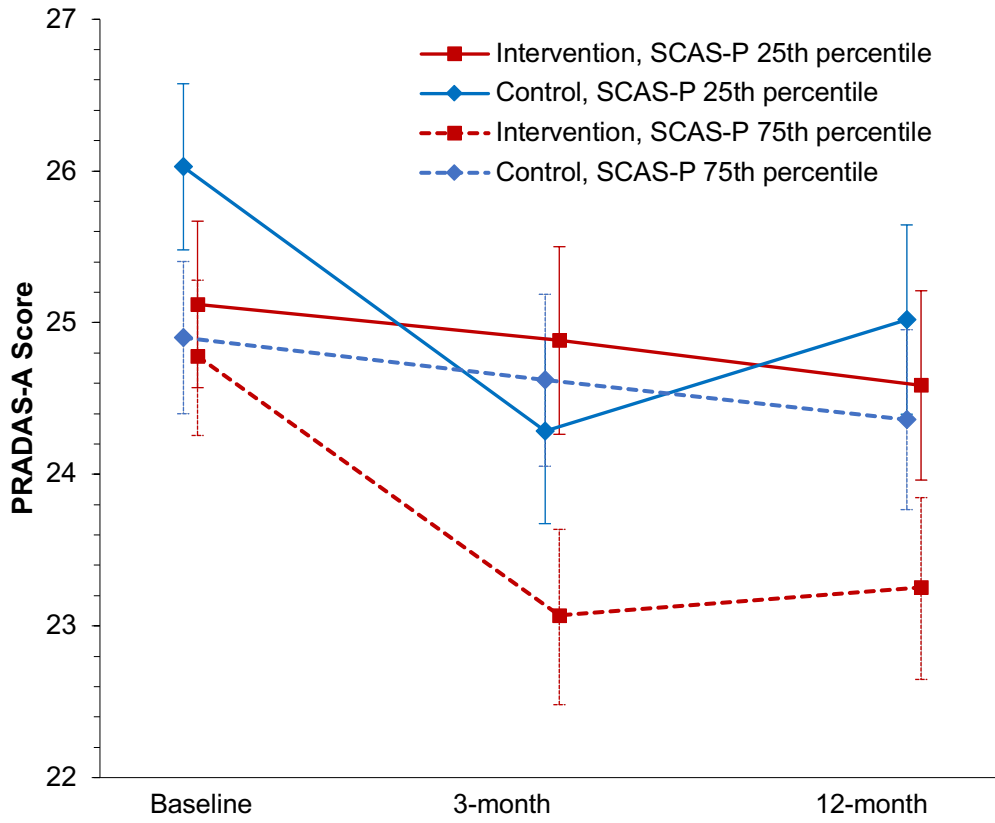

*Figure 1.* Estimated marginal means of PRADAS-A, with baseline SCAS-P (moderator variable) calculated at the 25<sup>th</sup> and 75<sup>th</sup> percentiles. Estimated under the group  $\times$  measurement occasion  $\times$  moderator mixed model. Error bars represent standard error. 25<sup>th</sup> percentile baseline SCAS-P = 9; 75<sup>th</sup> percentile baseline SCAS-P = 25.

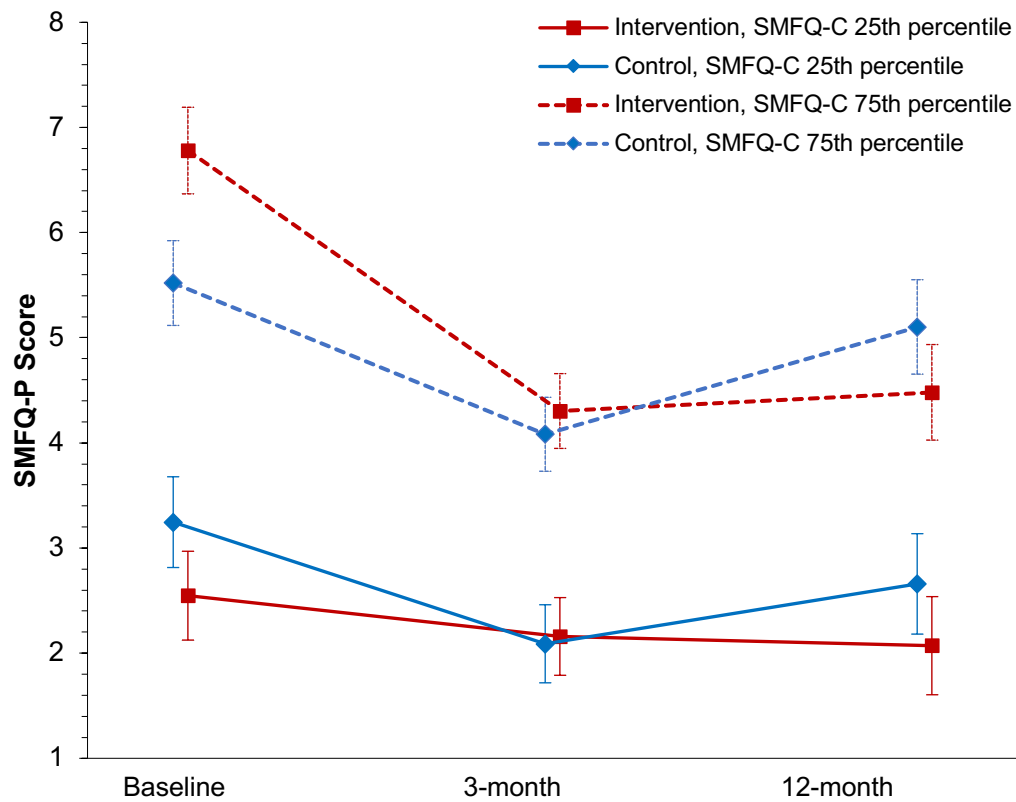

*Figure 2.* Estimated marginal means of SMFQ-P, with baseline SMFQ-C (moderator variable) calculated at the 25<sup>th</sup> and 75<sup>th</sup> percentiles. Estimated under the group  $\times$  measurement occasion  $\times$  moderator mixed model. Error bars represent standard error. 25<sup>th</sup> percentile baseline SMFQ-C = 2; 75<sup>th</sup> percentile baseline SMFQ-C = 10.
